# Supplementary material for: Mechanochemical synthesis and structural characterisation of a theophylline-benzoic acid cocrystal (1 : 1)
Source: Royal Society of Chemistry journal article supplement (doi:10.1039/c2ce25236h), 2012-01-01
Supplement: c2ce25236h.pdf [file c2ce25236h.pdf]

Supporting Information

## Mechanochemical Synthesis and Structural Characterisation of a Theophylline-Benzoic acid Cocrystal (1:1)

Sebastian Heiden,<sup>a</sup> Lisa Tröbs,<sup>a</sup> Klaus-Jürgen Wenzel<sup>a</sup> and Franziska Emmerling\*<sup>a</sup>

<sup>a</sup> BAM Federal Institute for Materials Research and Testing, Richard-Willstaetter-Strasse 11, 12489 Berlin, Germany.  
Fax: 030/8104-1139; Tel: 030/8104-1133

E-mail\*: [franziska.emmerling@bam.de](mailto:franziska.emmerling@bam.de)

### 1. Raman spectroscopy

Raman spectroscopic investigations were performed with a LabRam single stage spectrograph (Horiba Jobin-Yvon) at an excitation wavelength of 785 nm using a liquid nitrogen cooled CCD detector (256 × 1024 pixels) at a laser power of 6 mW and an acquisition time of 5 s (TP and cocrystal TP:BA) and 1 s (BA).

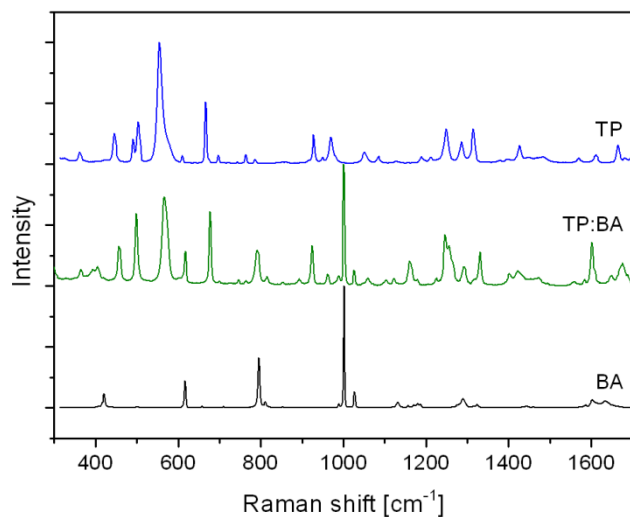

Figure S 1: Raman spectra of the cocrystal TP:BA (green) and the educts TP (blue) and BA (black).

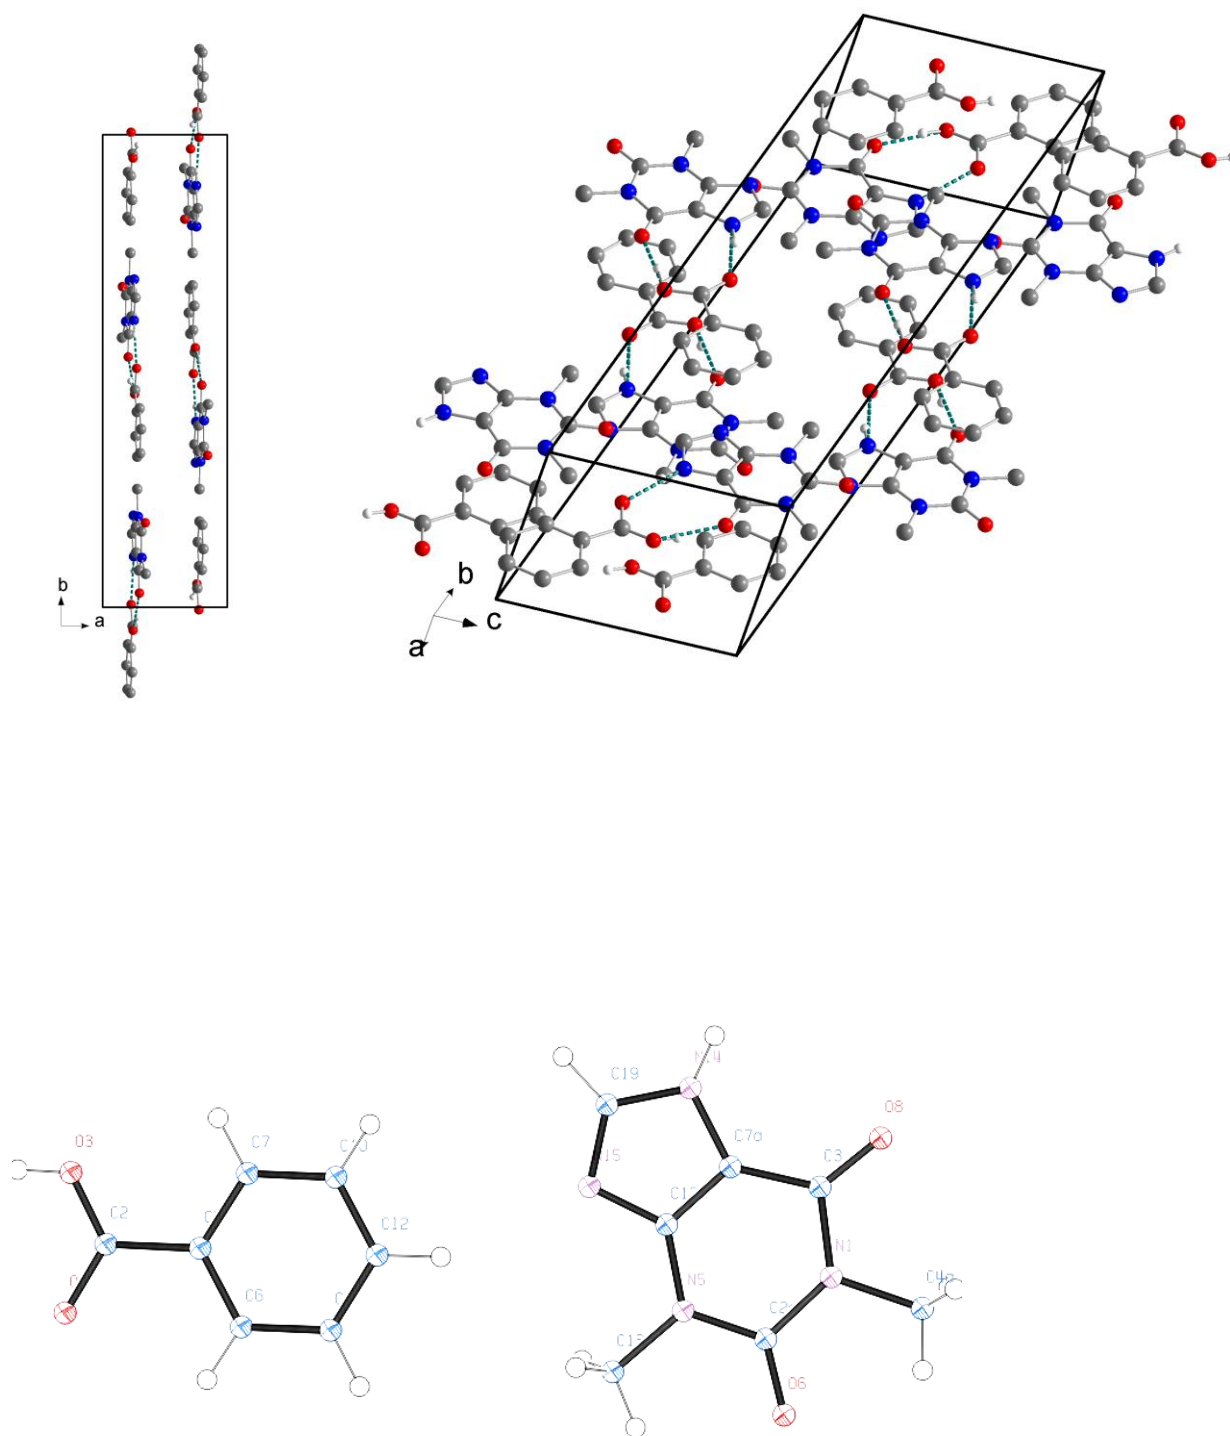

Figure S 2: Packing diagrams (upper row) and ORTEP representation (lower row) of the cocrystal TP:BA..
